# Supplementary material for: Magnetoelectric coupling drives ultrafast-charging MoS 2 anodes for sodium-ion batteries
Source: Royal Society of Chemistry journal article supplement (doi:10.1039/d5ee06010a), 2026-01-01
Supplement: d5ee06010a1.pdf [file d5ee06010a1.pdf]

## Supplementary Information

### **Magnetoelectric coupling drives ultrafast-charging MoS<sub>2</sub> anodes for sodium-ion batteries**

Zhenwei Li<sup>a</sup>, Zhiyu Zou<sup>b</sup>, Hengyuan Hu<sup>b</sup>, Jie Chen<sup>a</sup>, Mengchuang Liu<sup>a</sup>, Ping Liu<sup>a</sup>,  
Wenhua Zhang<sup>a</sup>, Chang Lu<sup>a</sup>, Zhaoxin Meng<sup>a</sup>, Yongqiang Ji<sup>a</sup>, Jie Yu<sup>c</sup>, Meisheng Han<sup>b\*</sup>,  
and Yuliang Cao<sup>a, d\*</sup>

<sup>a</sup>Institute of Physics, Henan Academy of Sciences, Zhengzhou 450046, China

<sup>b</sup>Department of Mechanical and Energy Engineering, Southern University of Science  
and Technology, Shenzhen 518055, China

<sup>c</sup>Shenzhen Engineering Lab for Supercapacitor Materials, Guangdong Provincial Key  
Laboratory of Semiconductor Optoelectronic Materials and Intelligent Photonic  
Systems, School of Material Science and Engineering, Harbin Institute of Technology,  
Shenzhen, University Town, Shenzhen 518055, China

<sup>d</sup>College of Chemistry and Molecular Sciences, Hubei Key Laboratory of  
Electrochemical Power Sources, Wuhan University, Wuhan, 430072, China

\*Corresponding Author.

E-mail address: [hanms@sustech.edu.cn](mailto:hanms@sustech.edu.cn); [ylcao@whu.edu.cn](mailto:ylcao@whu.edu.cn)

## Experimental Section

All chemicals (Macklin Co., Ltd) were analytically pure and used as received.

**Synthesis of MoS<sub>2</sub>, MoS<sub>2</sub>@C, and CoMoS<sub>2</sub>@C:** For the preparation of samples, the distinct amount of cobalt iso-octoate ((C<sub>11</sub>H<sub>7</sub>O<sub>2</sub>)<sub>2</sub>Co) /(NH<sub>4</sub>)<sub>2</sub>MoS<sub>4</sub>/DMF (0/1.5/0, MoS<sub>2</sub>; 0/0.6/0.9 g, MoS<sub>2</sub>@C; 0.5/0.5/0.5 g, CoMoS<sub>2</sub>@C) were added in the self-made vessels. After that, these vessels were sealed in an Ar-filled glove box, subsequently transferred to a tube furnace, heated to 550 °C for 10 min at a ramp rate of 10 °C min<sup>-1</sup> in an Ar flow, and then cooled to ambient temperature naturally to obtain these samples.

## Material characterizations:

The morphologies of all samples were characterized by SEM (Hitachi SU-8230). TEM equipped with EDS was performed using a Talos instrument with an acceleration voltage of 300 kV. XPS (Thermo Fisher ESCALAB Xi<sup>+</sup>) was acquired with Al K $\alpha$  (h $\nu$  = 1486.8 eV) as the excitation source. Raman spectra were tested on a Horiba Labram HR Evolution using a 532 nm laser. XRD (D/max-2500/PC, Rigaku) was used to test the crystal structure. TGA was tested in oxygen atmosphere using the Pyris I, PerkinElmer instrument over the temperature range of room temperature to 700 °C with a heating rate of 10 °C min<sup>-1</sup>. Brunauer-Emmett-Teller (BET) surface areas were calculated from nitrogen sorption/desorption isotherms obtained at 77 K on an ASAP 2020 PLUS HD88 instrument. The EPR spectra were obtained using a Bruker EMXplus spectrometer. The magnetic susceptibility curves were obtained using an MPMS SQUID magnetometer over a temperature range of 2-300 K, with a sampling interval of approximately 3 K.

## *In-situ TEM Experiment*

In situ TEM experiments were carried out on JEOL 2010F microscope working at 200 kV with a PicoFemto double-tilt TEM-STM holder provided by ZepTools Technology Company. The metallic Na, Na<sub>2</sub>O, and CoMoS<sub>2</sub>@C served as the counter electrode, electrolyte, and working electrode, respectively. CoMoS<sub>2</sub>@C was adhered on a TEM Cu half-grid by electrostatic adsorption, and metallic Na was scratched by an electrochemically etched tungsten tip in a glovebox. Then, the TEM grid and the tungsten tip with metal Na were loaded onto the TEM holder and sealed in a full argon-filled bag. Before putting the tungsten tip into TEM system, it was exposed in air about 5 s to obtain Na<sub>2</sub>O on surface of Na. In TEM, the W tip and Cu-grid were connected to the positive and negative poles of the potentiostat, respectively. Piezo-driven nanomanipulator was used to manipulate the tungsten tip with Na<sub>2</sub>O/Na to contact the free end of the selected CoMoS<sub>2</sub>@C. Once they were contacted, a constant voltage of 3 V was applied on the Na electrode with respect to CoMoS<sub>2</sub>@C electrode. During the sodiation process, TEM images, SAED patterns, and movie were recorded.

### ***In-situ* Magnetometry Experiment**

The magnetometry test devices were assembled using flexible packaging batteries in an argon-filled glovebox at room temperature. Operando magnetometry experiments were conducted using a Quantum Design superconducting quantum interference device at 25 °C. Magnetic measurements were consistently performed at an applied magnetic field of 3 T, oriented parallel to the surface of the copper foil. The *in-situ* magnetic measurements were performed using an external cyclic voltammetry (CV) mode with a scan rate of 0.5 mV s<sup>-1</sup>. To extract the relevant magnetic data, linear magnetic background signals originating from other components of the cell assembly were meticulously subtracted from the total magnetic moment. Specifically, a blank cell containing all components except the active material was first measured under the same *in-situ* conditions. Subsequently, an identical measurement was

performed on a cell containing the active materials. The background signal obtained from the blank cell was subtracted from the data of the cell containing the active material, and the final *in-situ* magnetic data were normalized according to the content of the target species.

### ***Electrochemical measurements of half cells***

The working electrodes were prepared by mixing 80 wt% of active materials, 10 wt% of acetylene black, and 10 wt% of polyvinylidene fluoride (PVDF) into N-methyl pyrrolidone under mechanical stirring to make the slurries. The as-prepared slurries were uniformly coated on the copper foil, and dried at 100 °C under vacuum for 12 h. 2032 coin-type cells contain working electrode, counter/reference electrode (sodium foil), and separator (Whatman glass fiber), as well as electrolyte (1 M NaPF<sub>6</sub> dissolved in diglyme), which were assembled in an argon-filled glove box. The mass loading of active materials in each electrode slice is 1.1-1.3 mg cm<sup>-2</sup>. Land CT2001A battery-test system (Wuhan Land Electronic co., China) was applied to evaluate the electrochemical performances of cells at the charge/discharge current densities of 0.1-20 A g<sup>-1</sup> between 0.01 and 3 V. A CHI 760D electrochemical workstation (Shanghai CH Instruments Co., China) was utilized to measure CV and electrochemical impedance spectroscopy (EIS). CV measurements were performed at scanning rates of 0.1-1 mV s<sup>-1</sup> from 0.01 to 3 V and from 0.01 to 1 V (vs. Na/Na<sup>+</sup>). EIS was carried out from 10<sup>5</sup> to 10<sup>-2</sup> Hz with an amplitude of 5 mV.

### ***Pouch full cells preparation***

For the pouch full cells assembly, the CoMoS<sub>2</sub>@C and Na<sub>3</sub>V<sub>2</sub>(PO<sub>4</sub>)<sub>3</sub> electrodes were used as anode and cathode, respectively. The active mass loadings of the CoMoS<sub>2</sub>@C and Na<sub>3</sub>V<sub>2</sub>(PO<sub>4</sub>)<sub>3</sub> electrode were set to 1.65 and 10.5 mg cm<sup>-2</sup> to keep an N/P ratio of about 1.1. The separator is Celgard 2400. Prior to full-cell assembly, the CoMoS<sub>2</sub>@C anode was pre-sodiated using sodium metal powder to compensate for the

initial irreversible capacity loss [1]. After removal of residual Na, the pre-sodiated CoMoS<sub>2</sub>@C anode was immediately used for full-cell assembly. Both electrodes have undergone a calendaring process. The prepared cathode and anode electrodes are trimmed to dimensions suitable for pouch cell assembly, with the cathode and anode alternately stacked in a total of 40 layers. The final pre-sealing of the completed pouch cell, following the filling of the electrolyte, was carried out inside a glovebox. The capacity of the assembled pouch full cell is about 1.2 Ah. The dimension of the pouch full cells is about 52.0 mm\*50.0 mm\*4.0 mm. The cycling and rate tests of the full cell were carried out at 0.1-3 C (1 C = 110 mA g<sup>-1</sup> based on the cathode material) between 0.5-3.5 V.

### Gravimetric energy density calculation

The gravimetric energy density can be obtained according to the following equation.

$$\text{Gravimetric energy density (Wh kg}^{-1}\text{)} = \left( \frac{C_c \times V}{m_{\text{active}}} \right)$$

Where  $V$ ,  $C_c$ , and  $m_{\text{active}}$  represent the nominal voltage (~2.08 V), cell capacity (1.2 Ah), and active mass (cathode and anode, 12.64 g), respectively.

### Calculation of anode utilization in CoMoS<sub>2</sub>@C||Na<sub>3</sub>V<sub>2</sub>(PO<sub>4</sub>)<sub>3</sub> pouch full cell

The utilization of the anode active material ( $U_n$ ) in the full cell is defined as the fraction of its theoretical capacity that is effectively accessed during full-cell operation.

It can be calculated using the following procedure:

#### 1. Theoretical anode capacity

The total theoretical capacity of the anode is given by:

$$C_{n,\text{theo}} = m_n \times s_n$$

Where  $m_n$  is the mass of the anode active material (1.79 g), and  $s_n$  is the reversible specific capacity of the anode measured in a half-cell (764.0 mAh g<sup>-1</sup>).

#### 2. Full-cell discharge capacity

The full-cell discharge capacity  $Q_{cell}$  (1200 mAh) is directly obtained from the galvanostatic discharge curve of the assembled pouch cell.

### 3. Anode Utilization

The anode utilization is calculated as:

$$U_n = Q_{cell} / C_{n,theo} \times 100\%$$

where  $U_n$  represents the percentage of the theoretical anode capacity that is effectively utilized in the full cell.

### DFT calculations:

The present first principle DFT calculations are performed by Vienna Ab initio Simulation Package (VASP) [2] with the projector augmented wave (PAW) method [3]. The exchange-functional is treated using the generalized gradient approximation (GGA) of Perdew-Burke-Ernzerhof (PBE) [4] functional. The energy cutoff for the plane wave basis expansion was set to 450 eV and the force on each atom less than 0.05 eV/Å was set for convergence criterion of geometry relaxation. Grimme's DFT-D3 methodology[5] was used to describe the dispersion interactions. Partial occupancies of the Kohn-Sham orbitals were allowed using the Gaussian smearing method and a width of 0.05 eV. The Brillouin zone was sampled with Gamma point  $2 \times 2 \times 1$  through all the computational process. The self-consistent calculations apply a convergence energy threshold of  $10^{-5}$  eV. A Climbing Image Nudged Elastic Band (CI-NEB) method was used to locate the transition states with the same convergence standard.

The free energy were calculated by the equation:  $\Delta G = \Delta E_{DFT} + \Delta E_{ZPE} - T\Delta S$ , where  $\Delta E_{DFT}$  is the DFT electronic energy difference of each step,  $\Delta E_{ZPE}$  and  $\Delta S$  are the correction of zero-point energy and the variation of entropy, respectively, which are obtained by vibration analysis, T is the temperature (T = 300 K).

## Calculation of the effective magnetic moment and the number of unpaired electrons:

The effective magnetic moment ( $\mu_{\text{eff}}$ ) was determined by fitting the magnetic susceptibility ( $\chi$ ), which is defined as:

$$\chi = \frac{M}{H}$$

where  $M$  is the magnetization and  $H$  is the applied magnetic field.

The temperature-dependent magnetic susceptibility follows the Curie-Weiss law:

$$\chi = \frac{C}{T - \Theta}$$

where  $\Theta$  is the Curie-Weiss temperature,  $T$  is the absolute temperature, and  $C$  is the Curie constant. The value of  $C$  was extracted from the linear fitting of the  $\chi^{-1}$ - $T$  plots shown in Fig. S28.

According to Langevin theory, the effective magnetic moment  $\mu_{\text{eff}}$  can be calculated from the Curie constant using the following relation:

$$\mu_{\text{eff}} = \sqrt{8C} \mu_B$$

Here,  $\mu_B$  is the Bohr magneton.

The number of unpaired electrons at the metal center can then be estimated from  $\mu_{\text{eff}}$  using the spin-only expression:

$$\mu_{\text{eff}} = \sqrt{n(n + 2)} \mu_B$$

where  $n$  denotes the number of unpaired electrons.

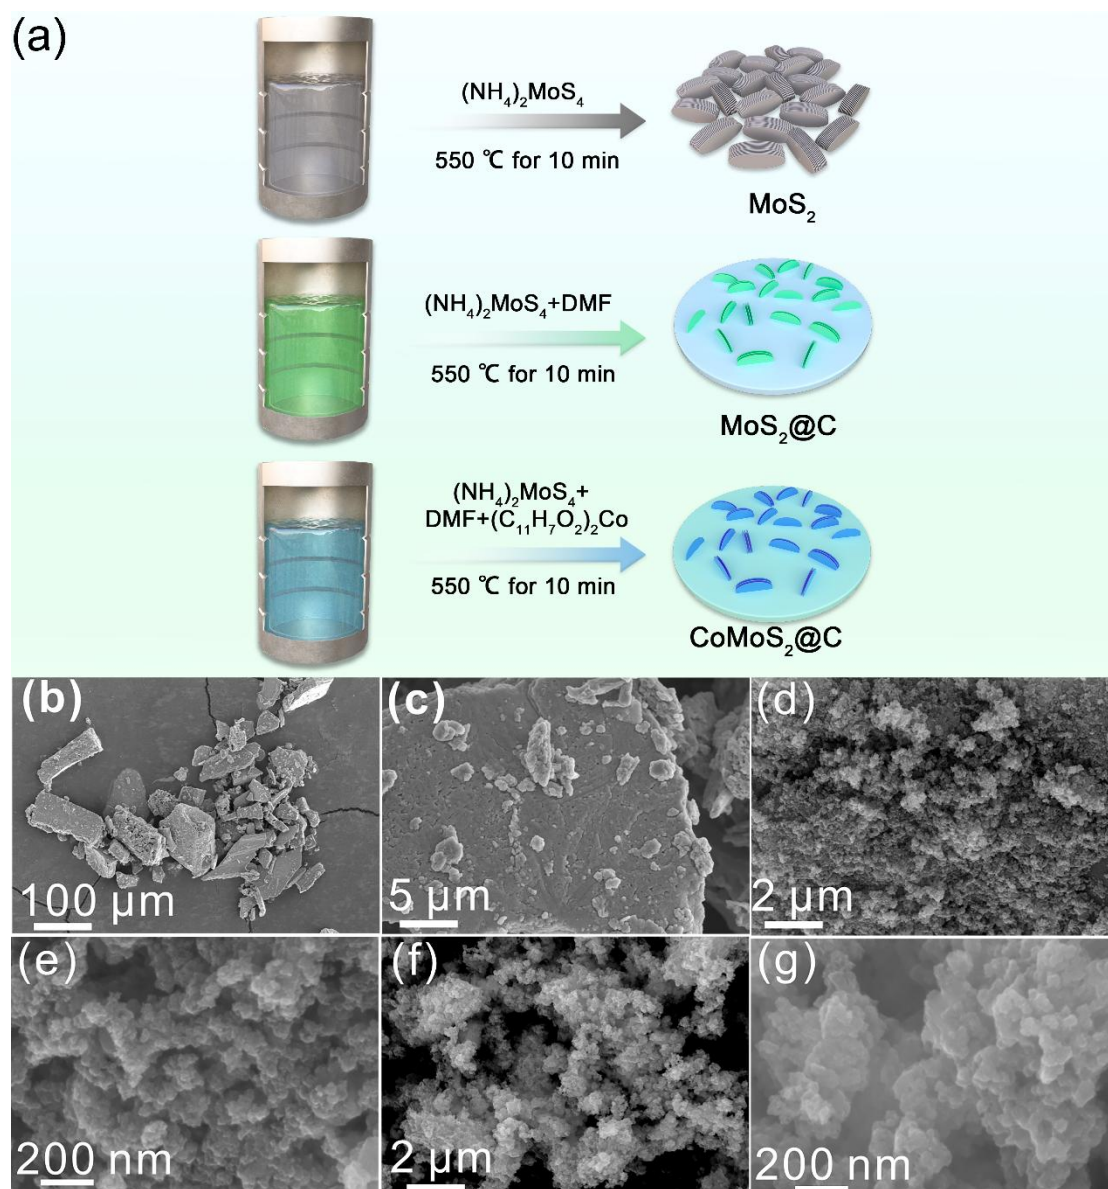

**Fig. S1** (a) The fabrication diagram of  $\text{MoS}_2$ ,  $\text{MoS}_2@\text{C}$ , and  $\text{CoMoS}_2@\text{C}$ . SEM images of (b, c)  $\text{MoS}_2$ , (d, e)  $\text{MoS}_2@\text{C}$ , and (f, g)  $\text{CoMoS}_2@\text{C}$ .



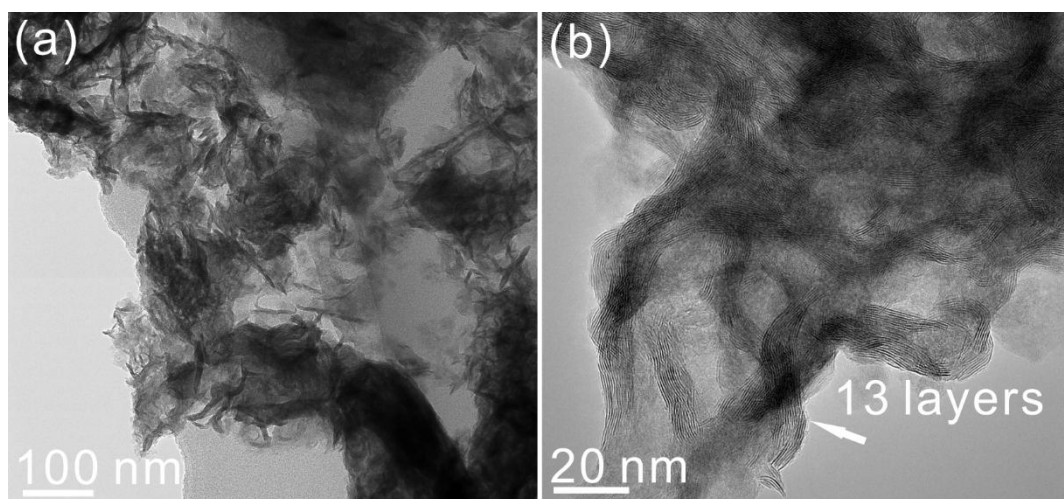

**Fig. S2** (a) TEM and (b) HRTEM image of MoS<sub>2</sub>.

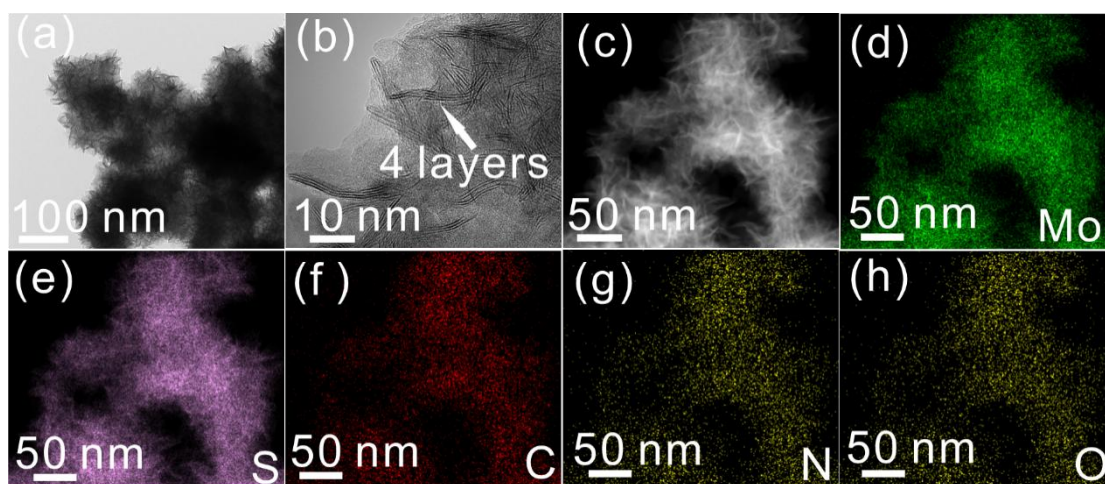

**Fig. S3** (a) TEM, (b) HRTEM image, (c-h) EDS images of MoS<sub>2</sub>@C.

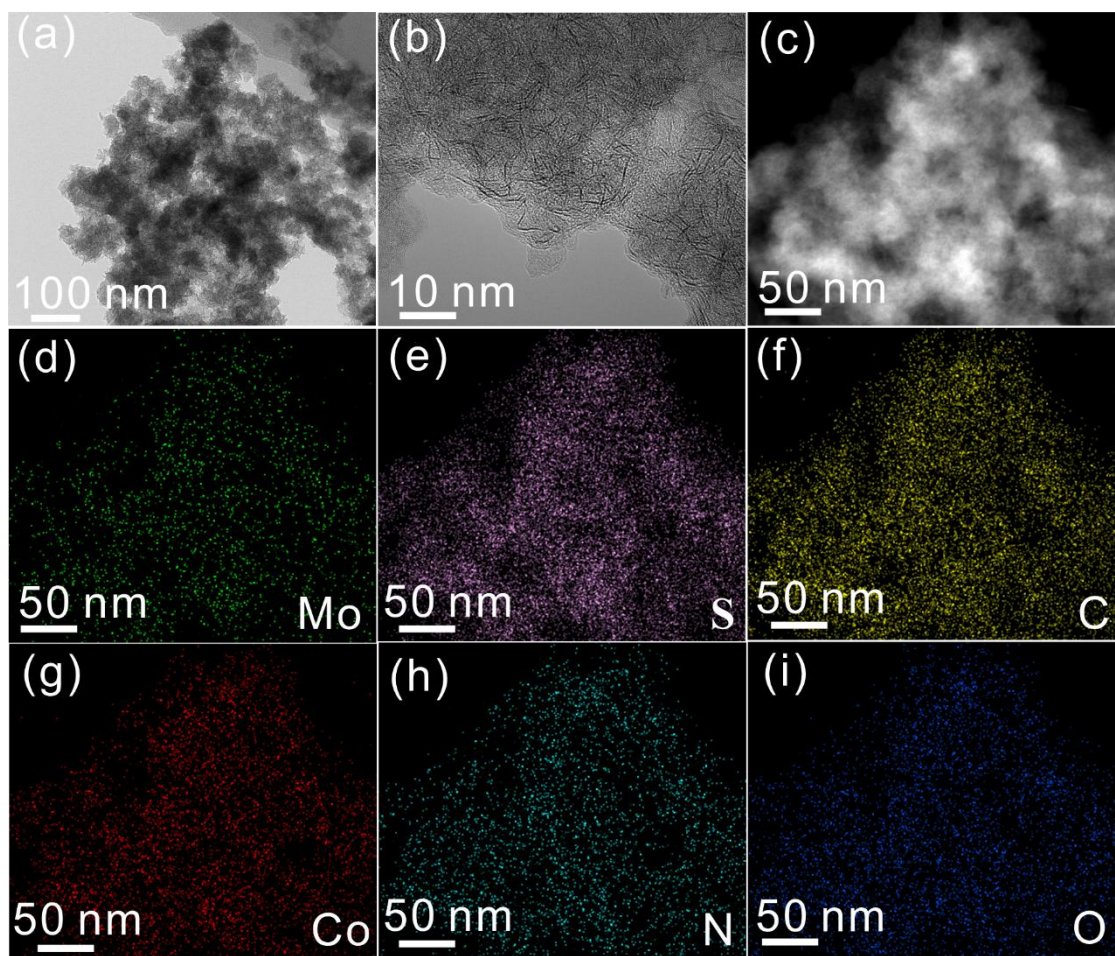

**Fig. S4** (a) TEM, (b) HRTEM image, (c-i) EDS images of CoMoS<sub>2</sub>@C.

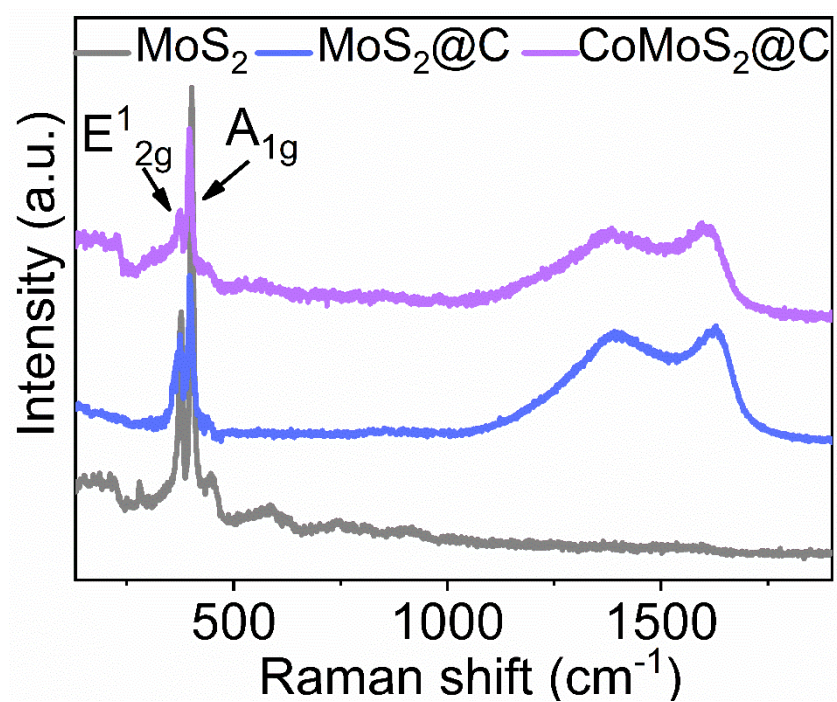

**Fig. S5** Raman spectra of MoS<sub>2</sub>, MoS<sub>2</sub>@C, and CoMoS<sub>2</sub>@C.

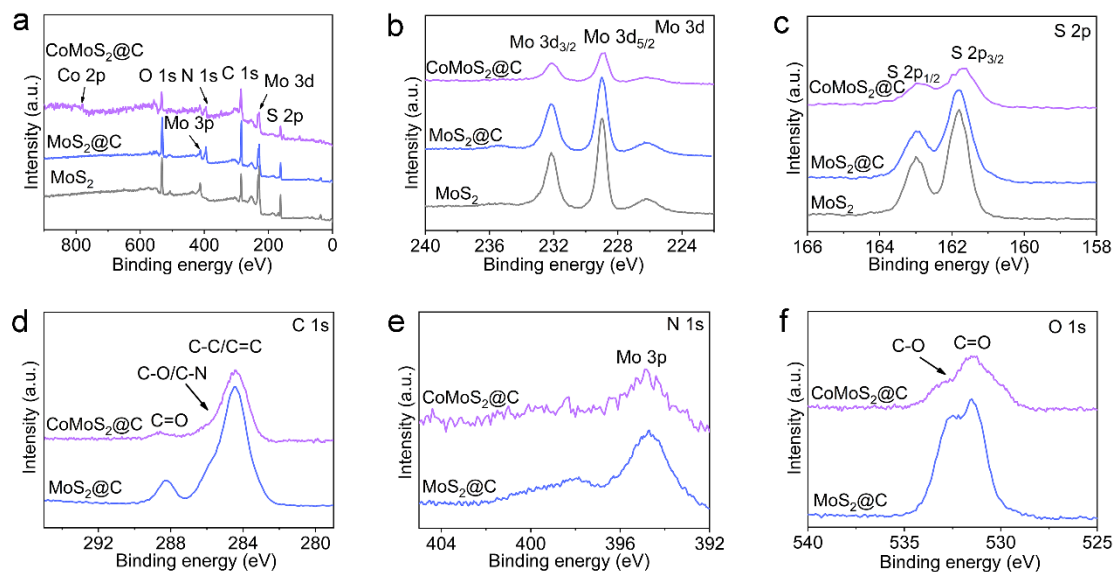

**Fig. S6** (a) XPS survey peaks, high-resolution XPS spectra of (b) Mo 3d, and (c) S 2p of MoS<sub>2</sub>, MoS<sub>2</sub>@C, and CoMoS<sub>2</sub>@C samples. High-resolution XPS spectra of (d) C 1s, (e) N 1s, and (f) O 1s of MoS<sub>2</sub>@C and CoMoS<sub>2</sub>@C samples.

**Table S1** Fitting results of XPS spectra of all the samples.

| Samples               | Mo (at%) | S (at%) | Co (at%) | C (at%) | N (at%) | O (at%) |
|-----------------------|----------|---------|----------|---------|---------|---------|
| MoS <sub>2</sub>      | 30.88    | 61.05   | 0        | 3.86    | 0       | 4.21    |
| MoS <sub>2</sub> @C   | 6.11     | 12.26   | 0        | 67.74   | 9.06    | 4.83    |
| CoMoS <sub>2</sub> @C | 3.87     | 8.33    | 1.67     | 73.94   | 8.23    | 3.96    |

The doping amount of N elements in the carbon materials should be calculated by  $N \text{ (at\%)} / (C \text{ (at\%)} + N \text{ (at\%)} + O \text{ (at\%)}) \times 100\%$ , respectively. The doping amount of Co element in MoS<sub>2</sub> should be calculated by  $Co \text{ (at\%)} / (Co \text{ (at\%)} + Mo \text{ (at\%)} + S \text{ (at\%)}) \times 100\%$ . The specific doping amount is represented in Tables S1 and S2.

**Table S2** The doping amount of Co element in MoS<sub>2</sub>.

| Samples               | Co (at%) |
|-----------------------|----------|
| CoMoS <sub>2</sub> @C | 12.04    |

**Table S3** The doping amount of N and O elements in the carbon matrix.

| Samples               | N (at%) | O (at%) |
|-----------------------|---------|---------|
| MoS <sub>2</sub> @C   | 11.10   | 5.92    |
| CoMoS <sub>2</sub> @C | 9.56    | 4.60    |

**Table S4** The elemental analysis (EA) results of the obtained samples.

| Samples               | Co (wt%) | Mo (wt%) | S (wt%) | C (wt%) | N (wt%) | O (wt%) |
|-----------------------|----------|----------|---------|---------|---------|---------|
| MoS <sub>2</sub> @C   | 0        | 49.2     | 32.6    | 14.1    | 2.5     | 1.6     |
| CoMoS <sub>2</sub> @C | 12.6     | 31.8     | 34.6    | 17.9    | 1.8     | 1.3     |

The S contents in the composites were measured using C/S elemental analyzers. The Co and Mo contents in the composites were tested by inductively coupled plasma mass spectrometer. The content of carbon matrix was calculated as a difference to 100 wt%. It can be seen that the mass percentages of carbon matrix are 18.2, and 21.0 wt%, corresponding to MoS<sub>2</sub>@C and CoMoS<sub>2</sub>@C, respectively. The results are generally consistent with the TGA analysis.



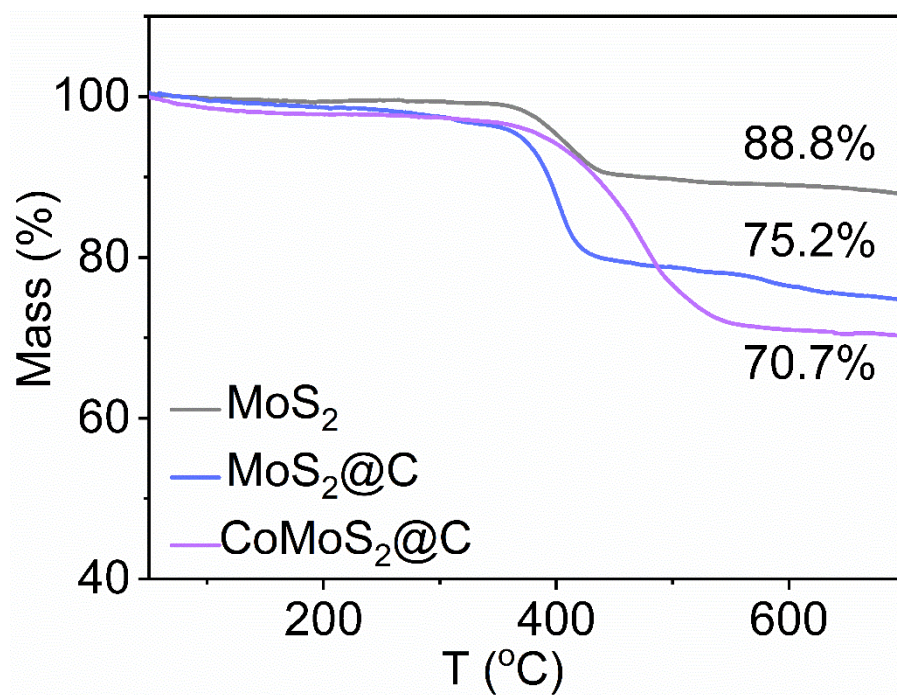

**Fig. S7** TGA curves of MoS<sub>2</sub>, MoS<sub>2</sub>@C, and CoMoS<sub>2</sub>@C samples.

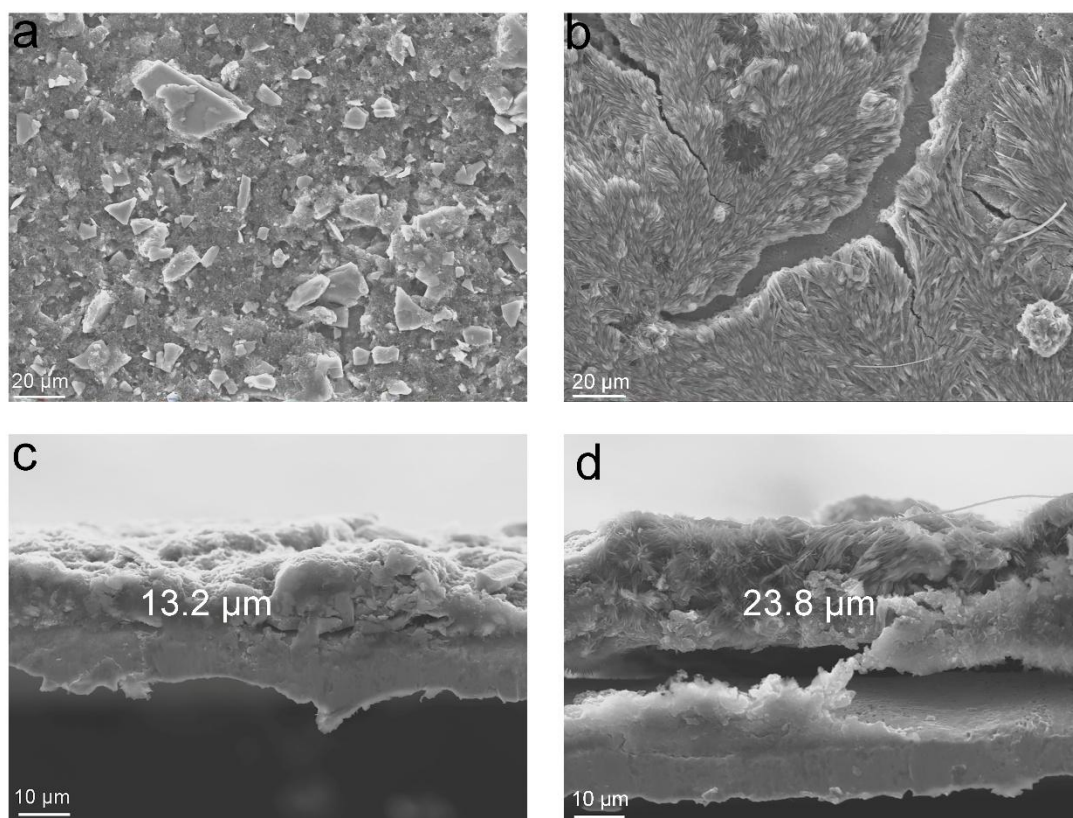

**Fig. S8** Top-view morphology of MoS<sub>2</sub> electrode (a) before and (b) after 100 cycles.

Cross-sectional morphology of MoS<sub>2</sub> electrode (c) before and (d) after 100 cycles.



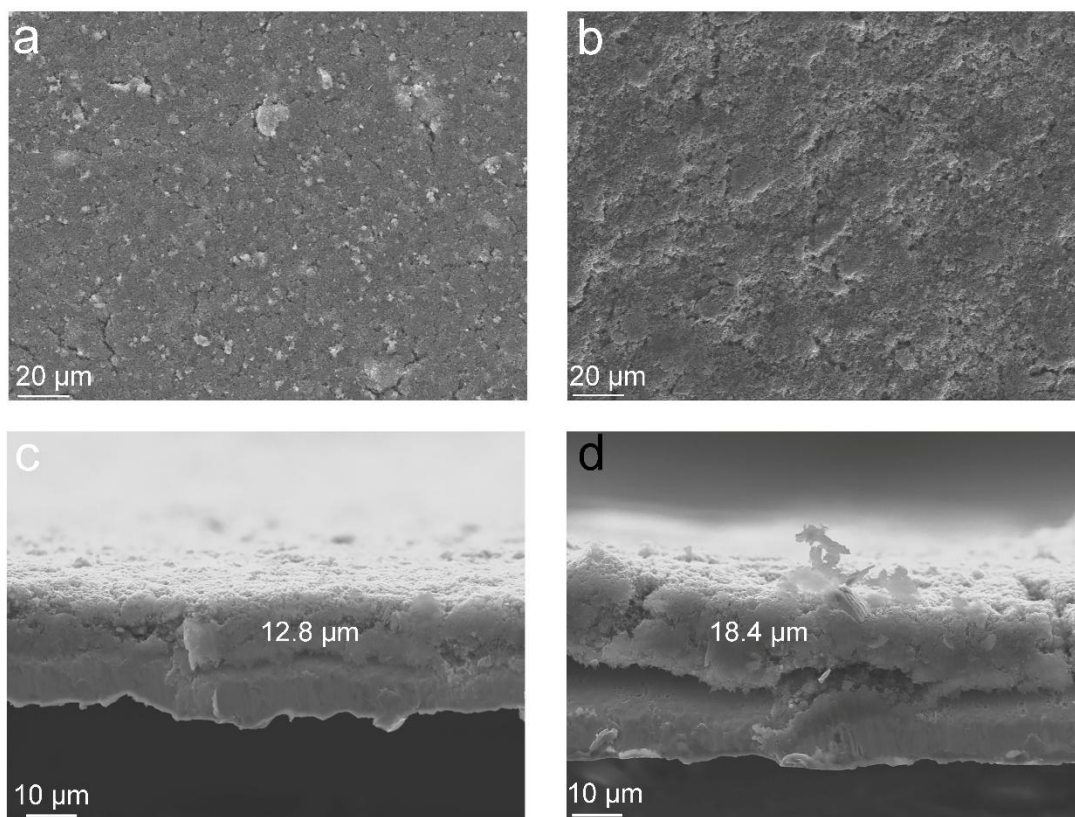

**Fig. S9** Top-view morphology of MoS<sub>2</sub>@C electrode (a) before and (b) after 100 cycles. Cross-sectional morphology of MoS<sub>2</sub>@C electrode (c) before and (d) after 100 cycles.

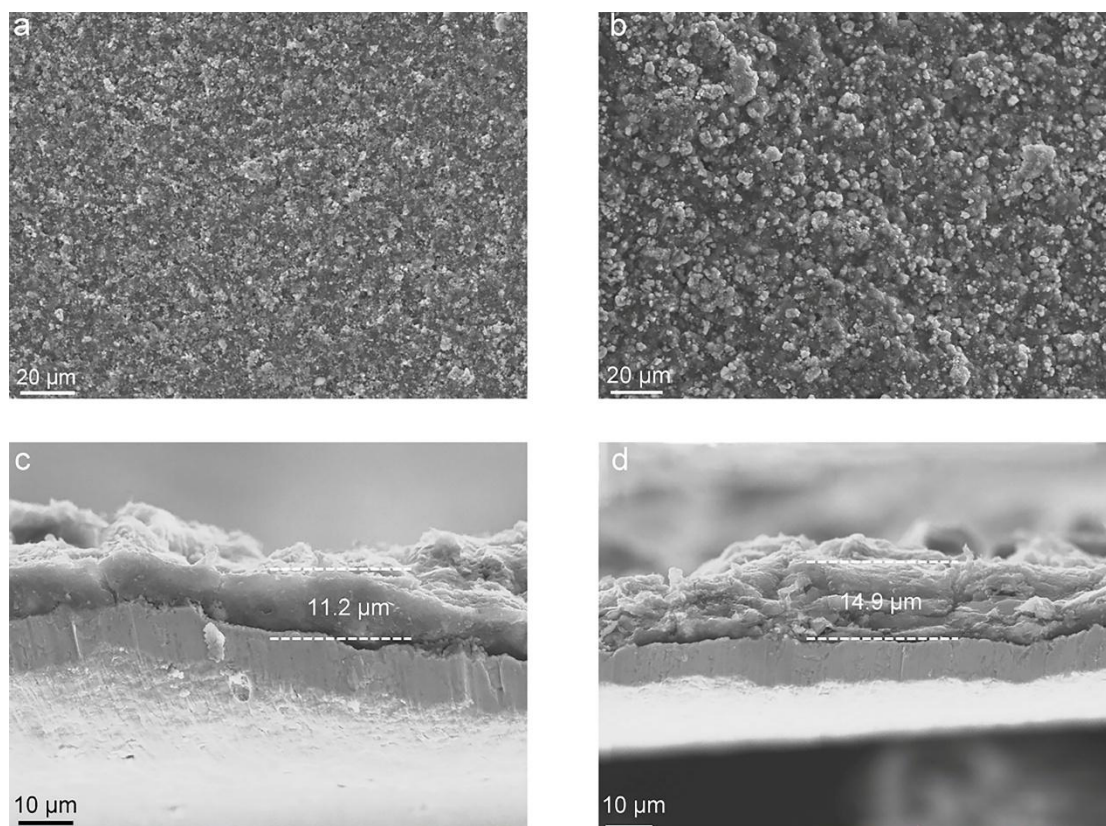

**Fig. S10** Top-view morphology of CoMoS<sub>2</sub>@C electrode (a) before and (b) after 100 cycles. Cross-sectional morphology of CoMoS<sub>2</sub>@C electrode (c) before and (d) after 100 cycles.

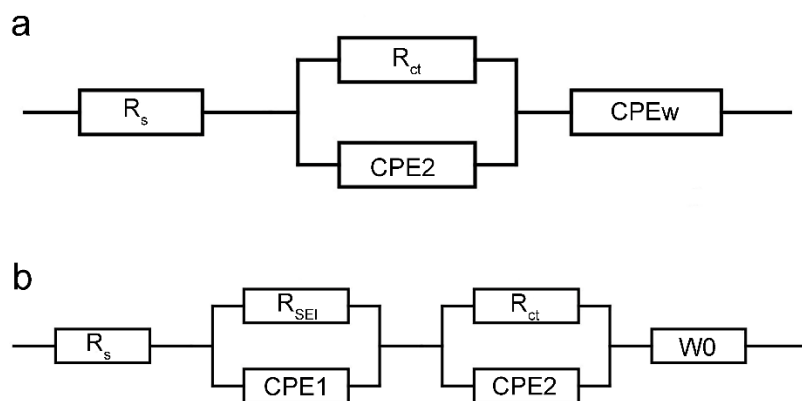

**Fig. S11** The fitted circuits of EIS spectra in Figs. 2d and e. (a) before and (b) after rate tests.

**Table S5**  $R_s$ ,  $R_{ct}$ ,  $R_{SEI}$ , and the slop of the sloping line of electrodes in low-frequency region before and after rate test. The data are from the fitted circuit of EIS spectra in the manuscript in Figs. 2d and e.

| Samples                                 | $R_s$ | $R_{ct}$ | $R_{SEI}$ | slope |
|-----------------------------------------|-------|----------|-----------|-------|
| MoS <sub>2</sub> , before rate test     | 4.3   | 247.5    | 0         | 1.0   |
| MoS <sub>2</sub> @C, before rate test   | 3.1   | 82.8     | 0         | 4.8   |
| CoMoS <sub>2</sub> @C, before rate test | 2.2   | 64.4     | 0         | 9.6   |
| MoS <sub>2</sub> , after rate test      | 5.9   | 392.9    | 74.8      | 0.7   |
| MoS <sub>2</sub> @C, after rate test    | 3.7   | 113.2    | 26.5      | 1.8   |
| CoMoS <sub>2</sub> @C, after rate test  | 2.9   | 83.4     | 10.3      | 2.4   |

**Table S6 Comparison of electrochemical performances** of CoMoS<sub>2</sub>@C with previously reported MoS<sub>2</sub>-based anode materials for SIBs in open reports. C<sub>C</sub>-charge capacity (mAh g<sup>-1</sup>), C<sub>R</sub>-capacity retention (%), M<sub>L</sub>-mass loading (mg cm<sup>-2</sup>), J-current density (A g<sup>-1</sup>), N<sub>C</sub>-cycle number, NA-not available.

| Samples                        | C <sub>C</sub> | C <sub>R</sub> | M <sub>L</sub> | J          | N <sub>C</sub> | References                                          |
|--------------------------------|----------------|----------------|----------------|------------|----------------|-----------------------------------------------------|
| <b>CoMoS<sub>2</sub>@C</b>     | <b>764.0</b>   | <b>96.6</b>    | <b>1.2</b>     | <b>0.1</b> | <b>100</b>     | <b>This work</b>                                    |
| <b>CoMoS<sub>2</sub>@C</b>     | <b>552.8</b>   | <b>85.4</b>    | <b>1.2</b>     | <b>5</b>   | <b>3000</b>    | <b>This work</b>                                    |
| MoS <sub>2</sub> @NC-SAMn/CNTs | 284.1          | 89.9           | NA             | 1          | 2000           | Angew. Chem., Int. Ed. Engl. 2024, 63, e202411255.  |
| L-MoS <sub>2-x</sub>           | 636.02         | 93.4           | NA             | 0.1        | 100            | Advanced Science (2025): e17576                     |
| Fe-M-HoMS-Q                    | 310.0          | 83.68          | 1.5            | 5          | 500            | Angew. Chem., Int. Ed. Engl. 2024, 136, e202400285. |
| SMO-4                          | 345            | 82.9           | 1.32           | 5          | 2300           | Adv. Funct. Mater. 2024, 34, 2311471.               |
| SA Co-MoS <sub>2</sub> /C      | 604.0          | NA             | 0.8-1.2        | 0.1        | NA             | Adv. Mater. 2023, 35, 2211690                       |
| SA Co-MoS <sub>2</sub> /C      | 334.0          | ~86.8          | 0.8-1.2        | 5          | 1380           | Adv. Mater. 2023, 35, 2211690                       |
| C-p-MoS <sub>2</sub> /CNT      | 666.0          | NA             | 1.2-1.5        | 0.05       | NA             | Adv. Funct. Mater. 2023, 33, 2207548                |
| C-p-MoS <sub>2</sub> /CNT      | 445            | 90.4           | 1.2-1.5        | 0.1        | 300            | Adv. Funct. Mater. 2023, 33, 2207548                |
| C-p-MoS <sub>2</sub> /CNT      | 295            | 74.5           | 1.2-1.5        | 2.5        | 1500           | Adv. Funct. Mater. 2023, 33, 2207548                |
| 1T-rich MoS <sub>2</sub> /m-C  | 557            | NA             | 1              | 0.1        | 80             | ACS Nano 2022, 16,                                  |

|                                                      |      |      |      |      |      |                                                   |
|------------------------------------------------------|------|------|------|------|------|---------------------------------------------------|
|                                                      |      |      |      |      |      | 12425–12436                                       |
| 1T-rich MoS <sub>2</sub> /m-C                        | 364  | NA   | 1    | 2    | 1000 | ACS Nano 2022, 16,<br>12425–12436                 |
| Cu <sub>2</sub> S@carbon@MoS <sub>2</sub>            | 430  | NA   | NA   | 0.05 | NA   | Angew. Chem., Int.<br>Ed. Engl. 2020, 59,<br>7178 |
| Cu <sub>2</sub> S@carbon@MoS <sub>2</sub>            | 297  | NA   | NA   | 3    | NA   | Angew. Chem., Int.<br>Ed. Engl. 2020, 59,<br>7178 |
| Cu <sub>2</sub> S@carbon@MoS <sub>2</sub>            | ~280 | 80.4 | NA   | 0.3  | 200  | ACS Nano 2021, 15,<br>13814                       |
| ANDC/MoS <sub>2</sub>                                | 496  | 94.5 | 1.3  | 1    | 1000 | ACS Nano 2021, 15,<br>13814                       |
| ANDC/MoS <sub>2</sub>                                | 336  | 72.4 | 1.3  | 5    | 300  | ACS Nano 2021, 15,<br>13814                       |
| Nb <sub>2</sub> CT <sub>x</sub> @MoS <sub>2</sub> @C | 530  | 87.0 | ~1.1 | 0.1  | 200  | ACS Nano 2021, 15,<br>7439                        |
| Nb <sub>2</sub> CT <sub>x</sub> @MoS <sub>2</sub> @C | 403  | 80   | ~1.1 | 1    | 2000 | ACS Nano 2021, 15,<br>7439                        |
| N-MoS <sub>2</sub> /C                                | 401  | 77.9 | 1    | 0.13 | 200  | Chem. Eng. J. 2020,<br>387, 124144                |
| M-c MoS <sub>2</sub>                                 | 401  | 89.1 | NA   | 0.2  | 150  | Nano Energy 2018,<br>51, 546                      |

---

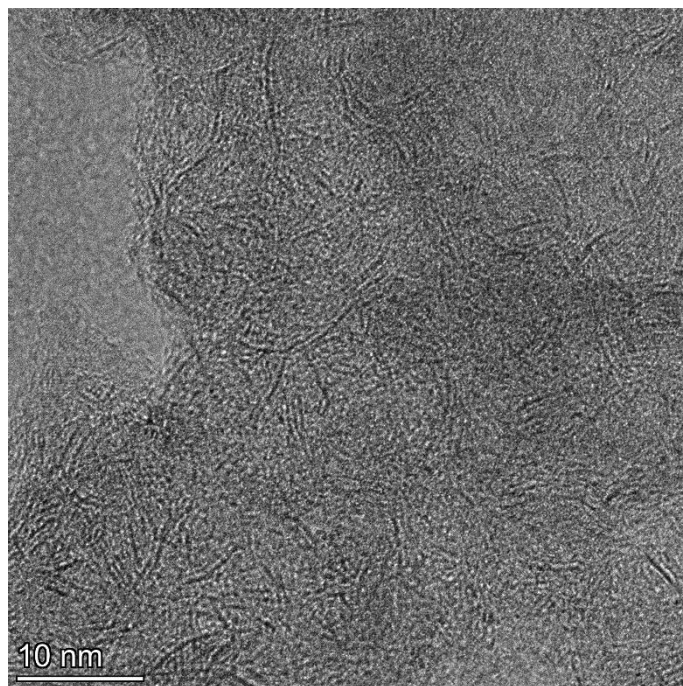

**Fig. S12** HRTEM image of CoMoS<sub>2</sub>@C after 18 s of electron-beam irradiation during *in situ* TEM measurements without applying a voltage.

To evaluate whether electron-beam irradiation could potentially affect the *in situ* TEM observations of the CoMoS<sub>2</sub>@C sample, we conducted additional control experiments (Video S1), in which the sample was exposed solely to the electron beam without applying any bias voltage. During continuous observation for 18 s, no obvious structural changes indicative of electron beam-induced phase transitions was observed. This conclusion was further confirmed by post-irradiation HRTEM analysis, which showed that electron beam exposure did not induce detectable changes in the microstructure of CoMoS<sub>2</sub>@C (Fig. S12).

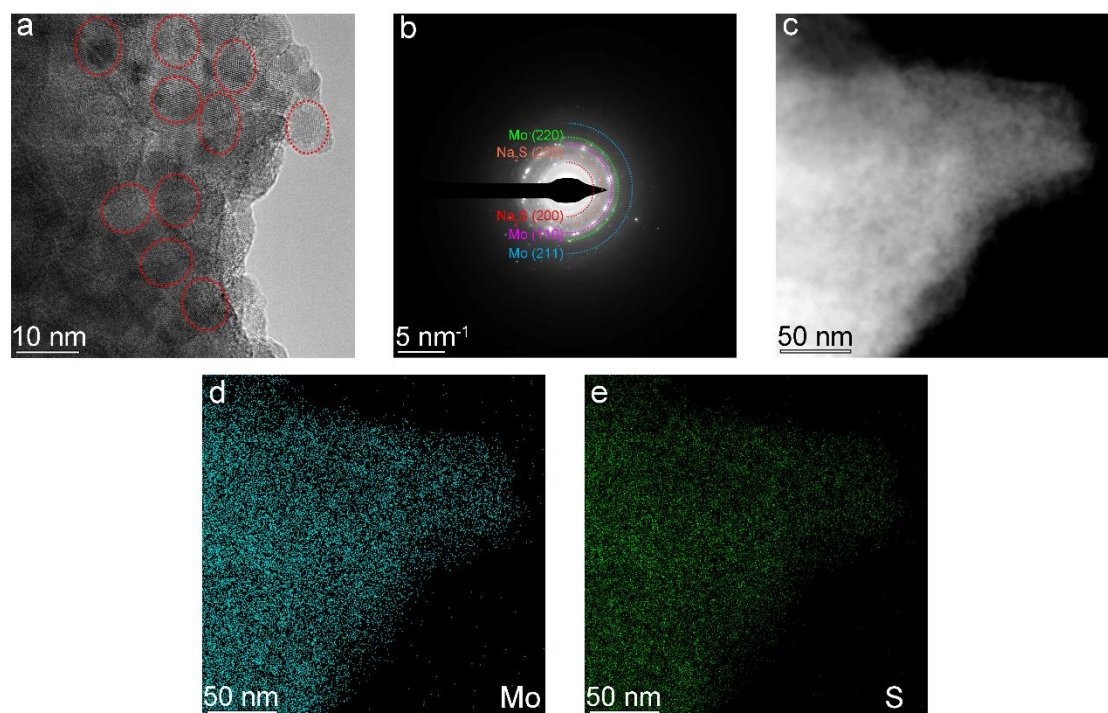

**Fig. S13** (a) HRTEM image, (b) SAED pattern, and (c-e) EDS images of MoS<sub>2</sub> electrode after discharging to 0.01 V.



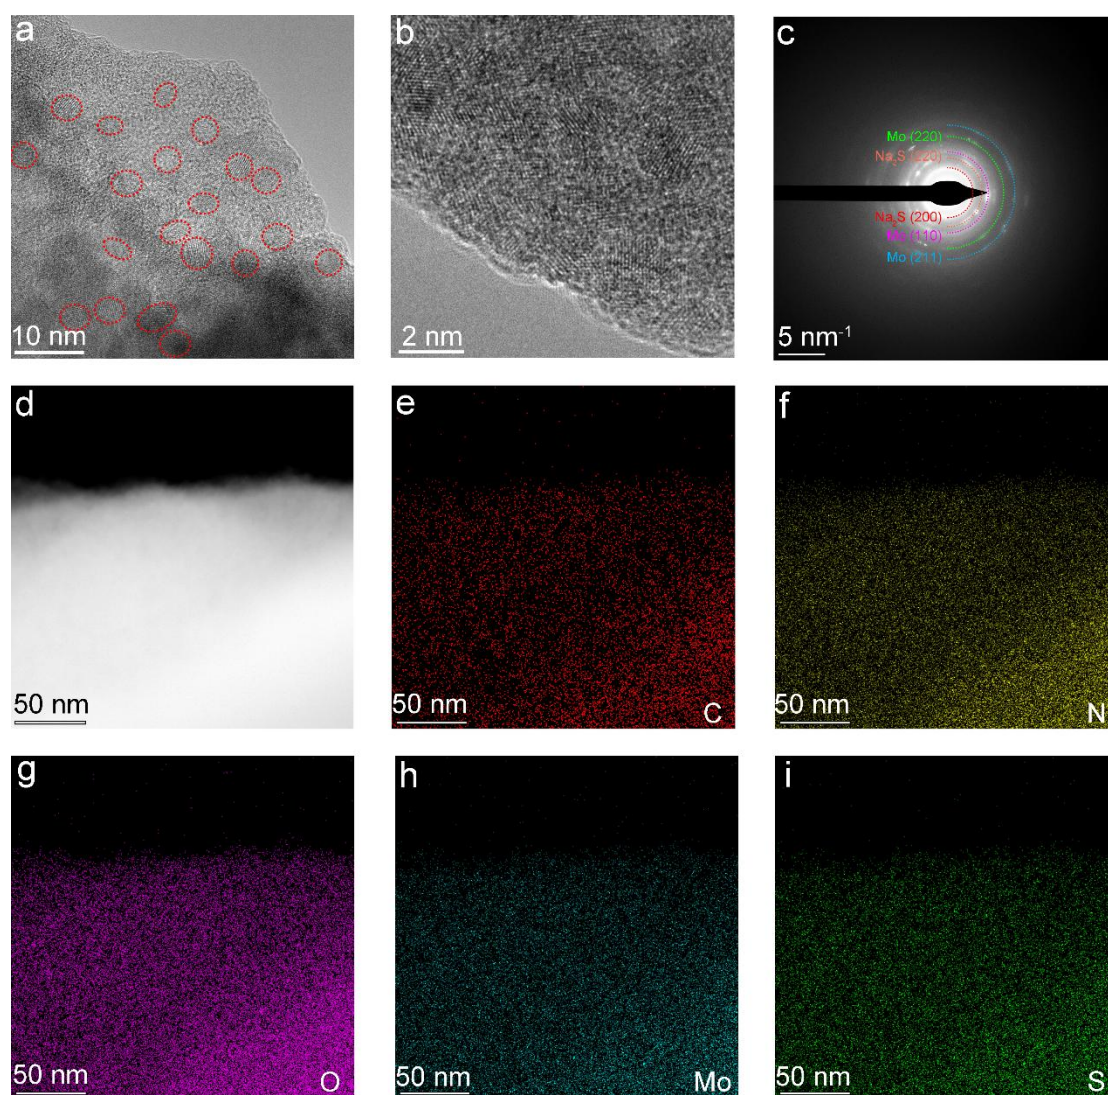

**Fig. S14** (a, b) HRTEM images, (c) SAED pattern, and (d-i) EDS images of MoS<sub>2</sub>@C electrode after discharging to 0.01 V.



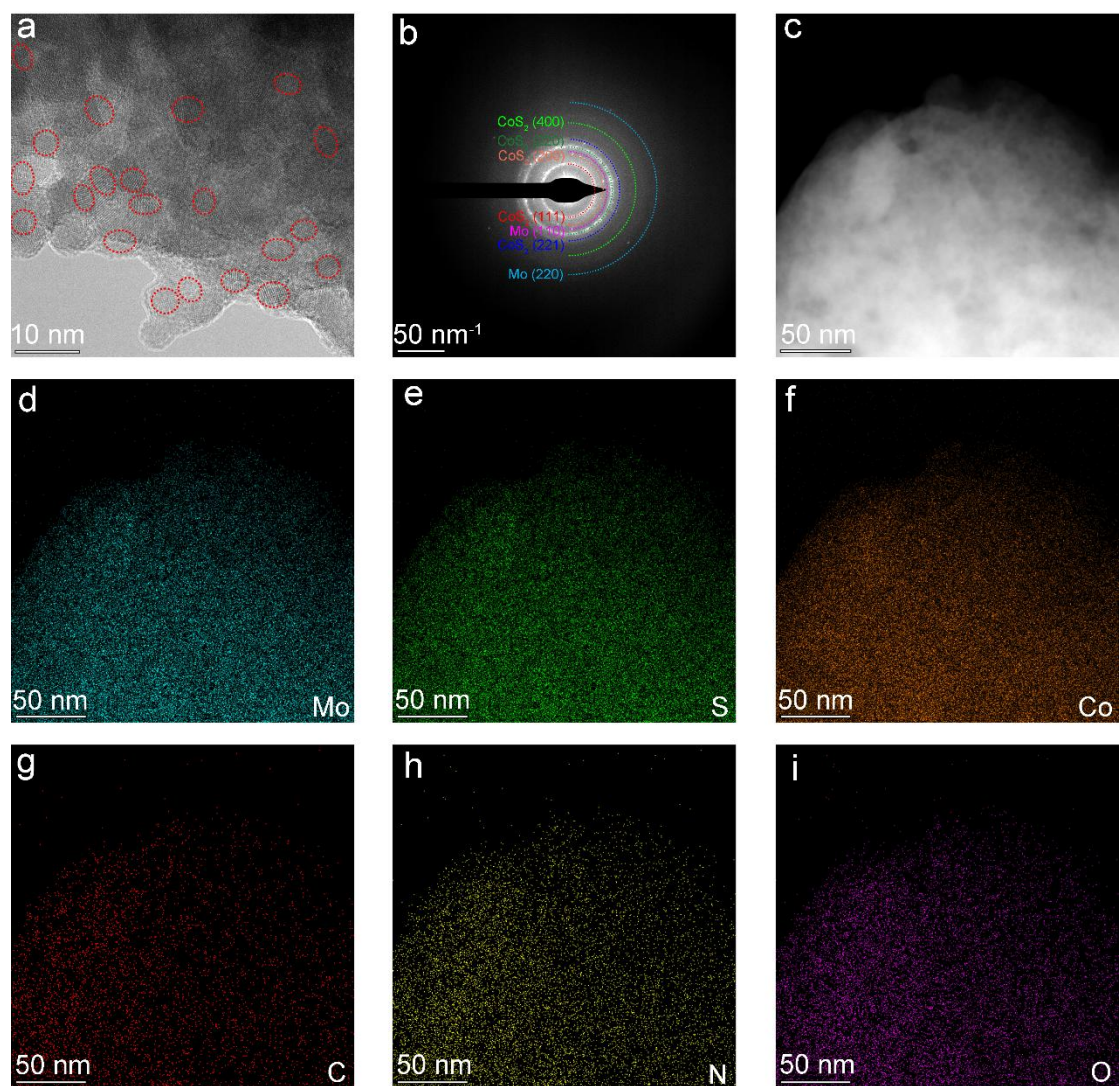

**Fig. S15** (a) HRTEM images, (b) SAED pattern, and (c-i) EDS images of CoMoS<sub>2</sub>@C electrode after charging to 3 V.

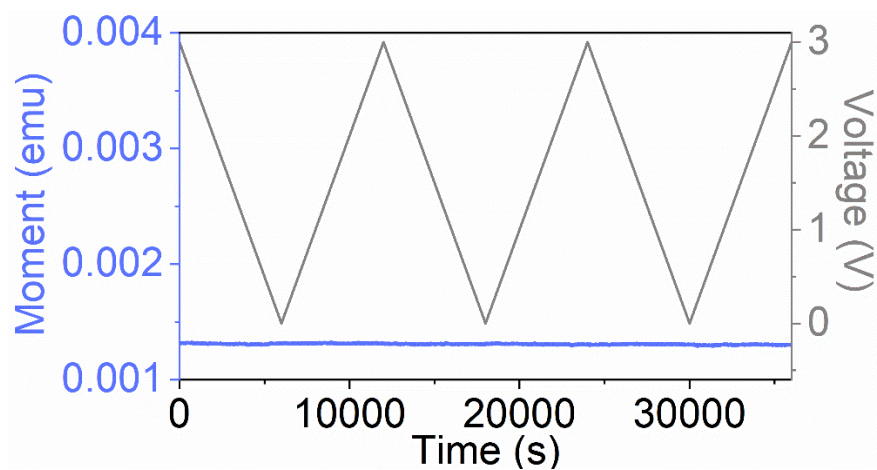

**Fig. S16** *In situ* magnetometry of blank cell during electrochemical cycling.

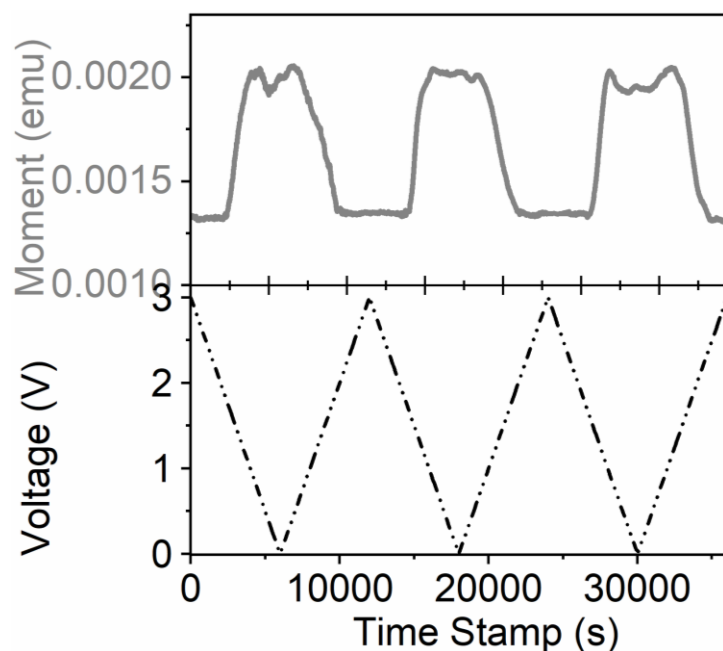

**Fig. S17** Initial data of in situ magnetometry of CoMoS<sub>2</sub>@C during electrochemical cycling.

To eliminate the influence of electrochemically inactive components in the assembled cells, including copper foil, electrolyte, binder, and conductive additives, on the *in situ* magnetic measurements, blank cells were assembled and subjected to identical in situ magnetic tests. Specifically, the blank cells were fabricated following the same procedure as that used for the in situ magnetic measurements, except that no active material was added, while all other components were kept unchanged. It should be noted that the *in situ* magnetic spectra shown in Fig. 3h were obtained by subtracting the magnetic response of the blank cell (Fig. S16) from the original in situ magnetic data (Fig. S17) and subsequently normalizing the results according to the Co content, thereby revealing the intrinsic magnetic behavior of the CoMoS<sub>2</sub>@C electrode.

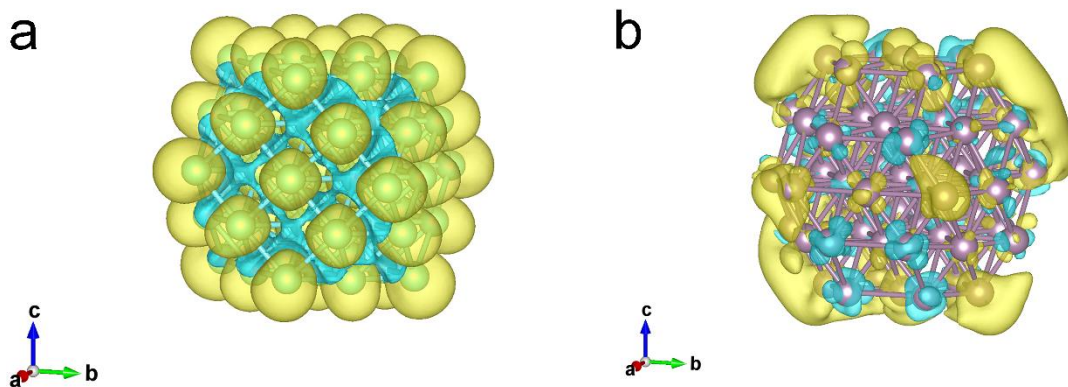

**Fig. S18** Spin charge density distribution of (a) Co and (b) Mo clusters.

**Table S7** Magnetic moments ( $\mu_B$ ) of individual atoms in the Co cluster in Fig. S18a obtained from DFT calculations.

|       |       |       |       |       |       |       |       |       |       |
|-------|-------|-------|-------|-------|-------|-------|-------|-------|-------|
| 1.187 | 1.547 | 1.546 | 1.545 | 1.731 | 1.732 | 1.731 | 1.803 | 1.546 | 1.73  |
| 1.73  | 1.731 | 1.802 | 1.73  | 1.546 | 1.731 | 1.73  | 1.546 | 1.546 | 1.733 |
| 1.803 | 1.73  | 1.729 | 1.801 | 1.732 | 1.802 | 1.729 | 1.729 | 1.547 | 1.731 |
| 1.546 | 1.73  | 1.547 | 1.803 | 1.73  | 1.731 | 1.731 | 1.547 | 1.546 | 1.731 |
| 1.729 | 1.801 | 1.731 | 1.73  | 1.73  | 1.802 | 1.732 | 1.803 | 1.731 | 1.802 |
| 1.73  | 1.731 | 1.73  | 1.802 | 1.802 |       |       |       |       |       |

**Table S8** Magnetic moments ( $\mu_B$ ) of individual atoms in the Mo cluster in Fig. S18b obtained from DFT calculations.

|        |        |        |        |        |        |        |        |        |        |
|--------|--------|--------|--------|--------|--------|--------|--------|--------|--------|
| 0.019  | -0.066 | -0.014 | 0.037  | -0.004 | -0.019 | -0.053 | 0.088  | -0.021 | 0.139  |
| -0.082 | 0.126  | -0.078 | 0.271  | -0.055 | -0.063 | -0.004 | -0.068 | -0.017 | -0.078 |
| 0.126  | -0.043 | 0.15   | 0.073  | 0.066  | 0.007  | 0.227  | 0.126  | 0.075  | -0.088 |
| 0.117  | -0.087 | -0.075 | -0.082 | 0.081  | -0.049 | -0.108 | 0.032  | -0.092 | 0.012  |
| -0.041 | 0.128  | 0.125  | -0.058 | 0.002  | 0.035  | 0.31   | 0.06   | 0.019  | -0.005 |
| 0.181  | 0.142  | 0.061  | -0.016 | -0.064 | 0.049  | 0.241  | 0.035  | 0.191  |        |

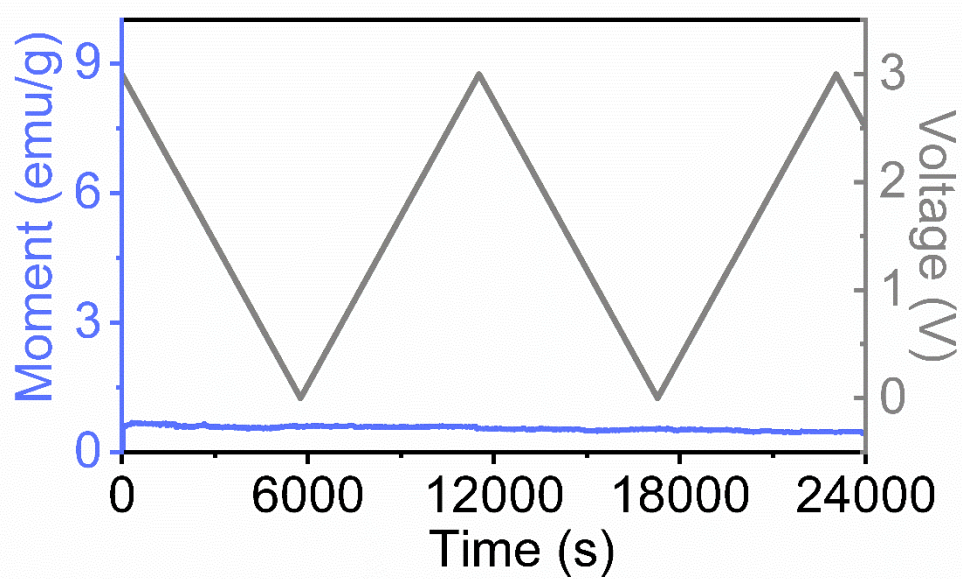

**Fig. S19** *In situ* magnetometry of MoS<sub>2</sub> electrode during electrochemical cycling.

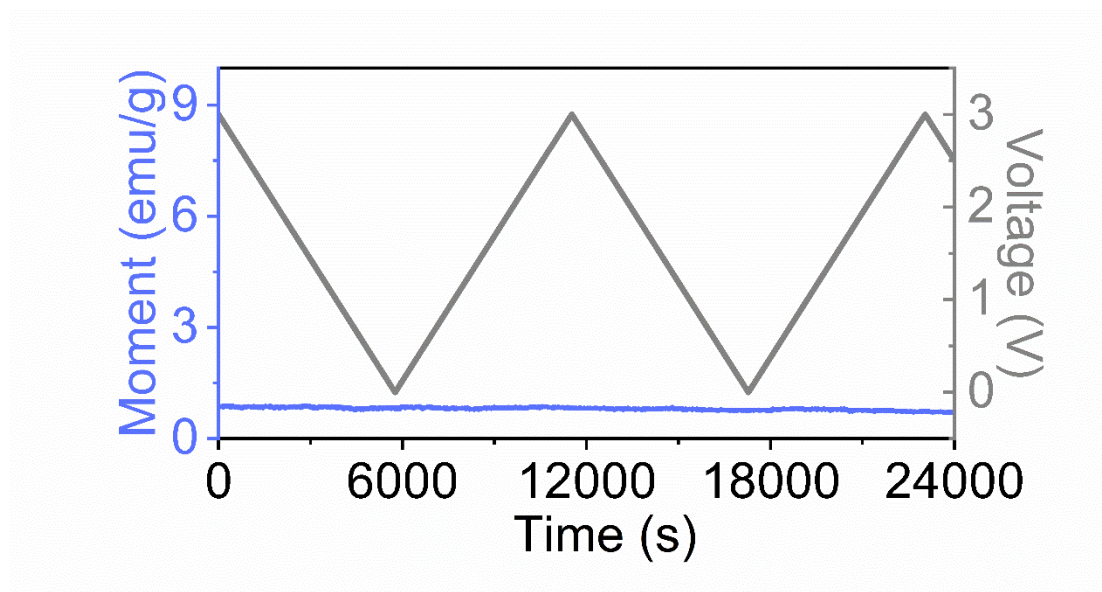

**Fig. S20** *In situ* magnetometry of MoS<sub>2</sub>@C electrode during electrochemical cycling.

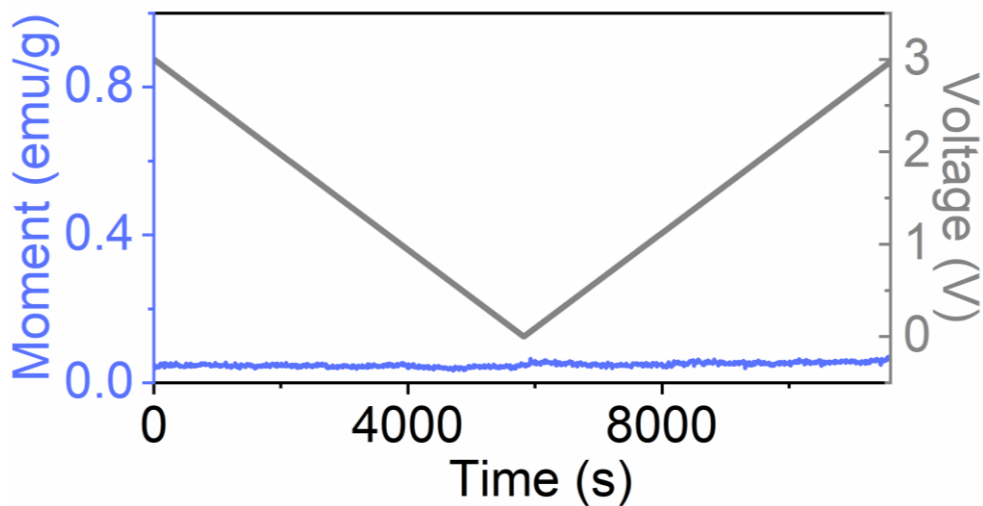

**Fig. S21** *In situ* magnetometry of DMF-derived carbon electrode during electrochemical cycling.

We further performed in-situ magnetic measurements on DMF-derived carbon to clarify the origin of the magnetic response in  $\text{CoMoS}_2@\text{C}$ . The DMF-derived carbon was obtained by sealing DMF in a high-pressure autoclave inside a glovebox, followed by thermal treatment under the same conditions applied to the other samples.

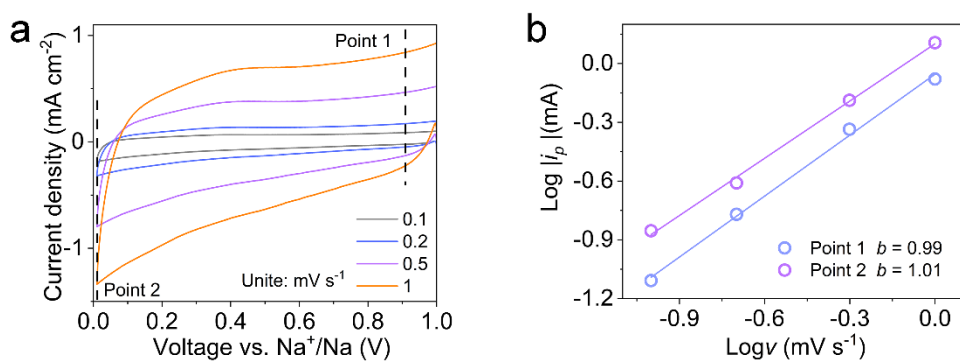

**Fig. S22** (a) CV curves at the voltage range of 0.01-1 V and (b)  $\log |i_p|$  against  $\text{Log } v$  at points 1 and 2 of CoMoS<sub>2</sub>@C electrode.



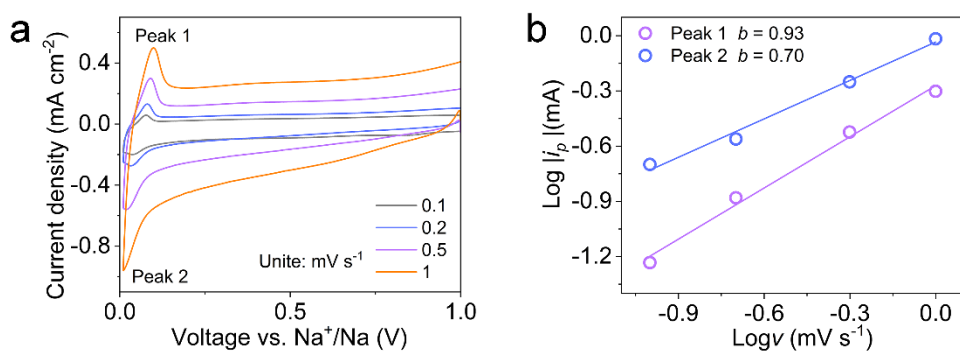

**Fig. S23** (a) CV curves at the voltage range of 0.01-1 V and (b)  $\log |i_p|$  against  $\text{Log } v$  at peaks 1 and 2 of MoS<sub>2</sub> electrode.

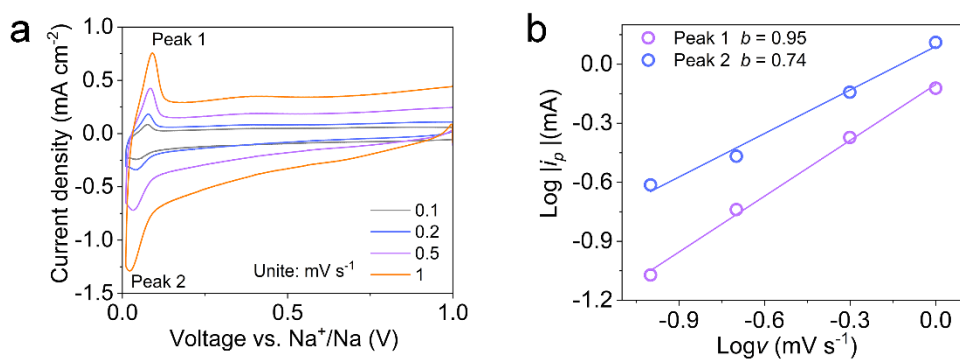

**Fig. S24** (a) CV curves at the voltage range of 0.01-1 V and (b)  $\log |i_p|$  against  $\text{Log } v$  at peaks 1 and 2 of MoS<sub>2</sub>@C electrode.

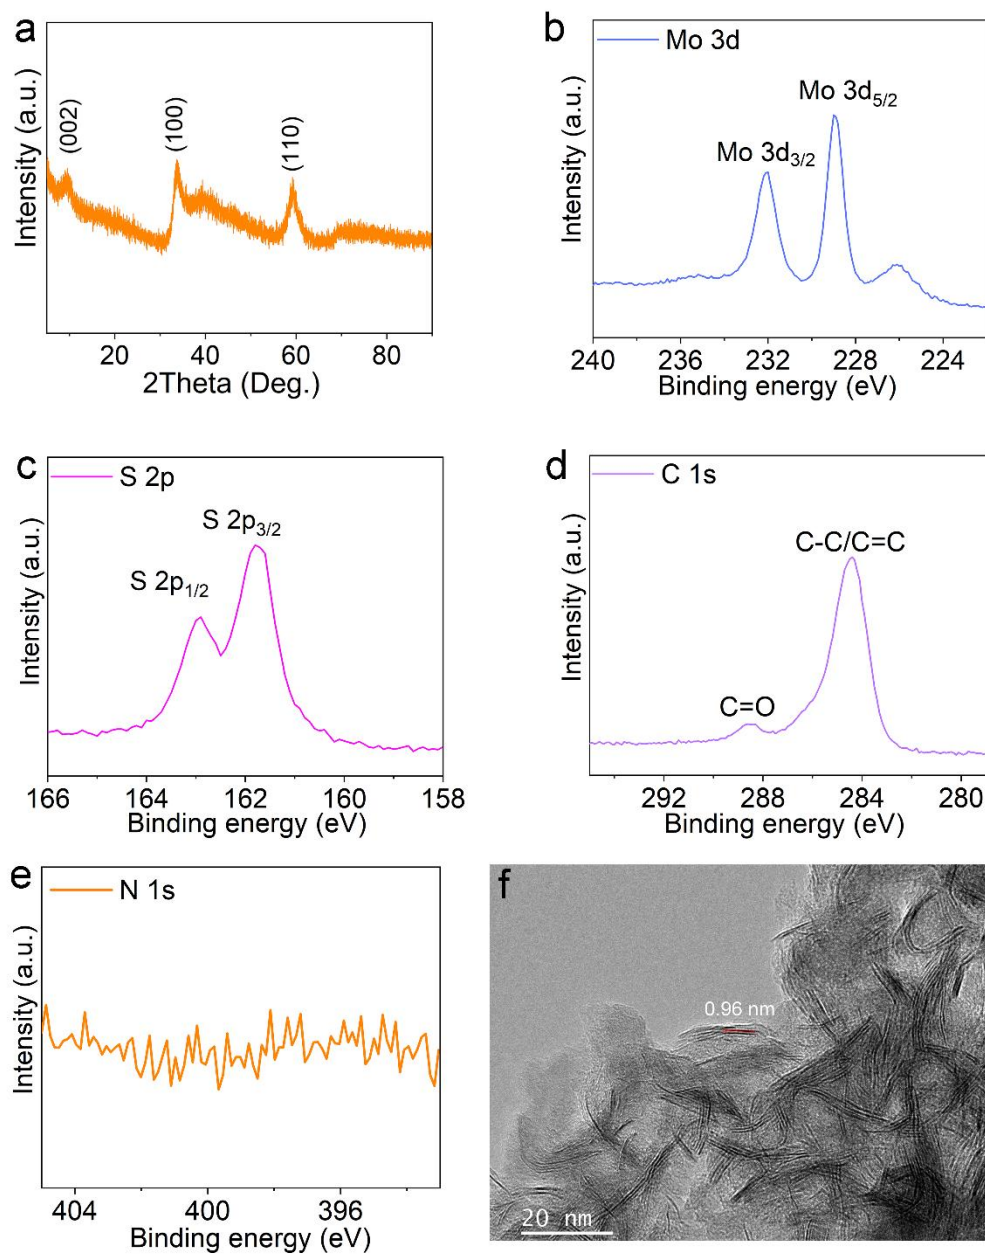

**Fig. S25** (a) XRD pattern, high-resolution XPS spectra of (b) Mo 3d, (c) S 2p, (d) C 1s, and (e) N 1s of MoS<sub>2</sub>@C-I sample without N doping. (f) HRTEM image of MoS<sub>2</sub>@C-I sample without N doping.

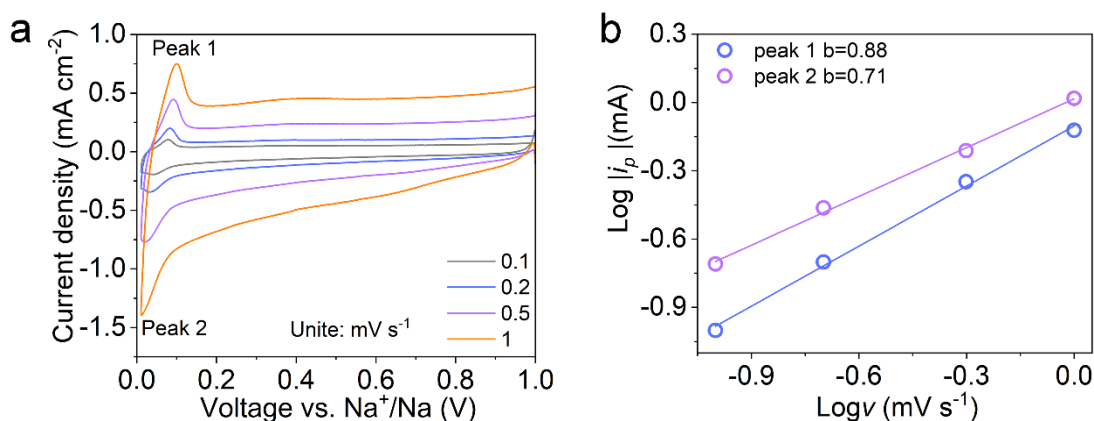

**Fig. S26** (a) CV curves at the voltage range of 0.01-1 V and (b)  $\log |i_p|$  against  $\log v$  at peaks 1 and 2 of the MoS<sub>2</sub>@C-I electrode without N doping.

CV measurements in the 0.01-1 V window show nearly rectangular curves for CoMoS<sub>2</sub>@C (Fig. S22a), with  $b$ -values close to 1 for all samples (CoMoS<sub>2</sub>@C: 0.99, 1.01, Fig. S22b; MoS<sub>2</sub>: 0.93, 0.70, Fig. S23; MoS<sub>2</sub>@C: 0.95, 0.74, Fig. S24), indicating predominantly surface-controlled behavior. The slightly higher  $b$ -values of CoMoS<sub>2</sub>@C reflect an enhancement of surface-controlled kinetics, consistent with the spin-polarized surface capacitance effect. To further rule out the influence of N doping on the  $b$ -values, dimethyl sulfoxide (DMSO) was used instead of DMF to dissolve (NH<sub>4</sub>)<sub>2</sub>MoS<sub>4</sub>, while all other synthesis parameters were kept identical to those used for MoS<sub>2</sub>@C, yielding the MoS<sub>2</sub>@C-I sample without N doping. Comparison of the XRD, XPS, and HRTEM characterizations of MoS<sub>2</sub>@C-I (Fig. S25) with those of MoS<sub>2</sub>@C (Fig. 1c, 1e and Figs. S6b-S6e) shows that, apart from the absence of N doping in MoS<sub>2</sub>@C-I (Fig. S25e), the crystal structure and phase composition of MoS<sub>2</sub>@C-I are essentially identical to those of MoS<sub>2</sub>@C. CV measurements of the MoS<sub>2</sub>@C-I electrode in the 0.01-1 V voltage window (Fig. S26) indicate that the  $b$ -values corresponding to peak 1 and peak 2 are 0.88 and 0.71, respectively. Compared with the corresponding  $b$ -values of the MoS<sub>2</sub>@C electrode, N doping leads to only a marginal increase in the  $b$ -value of MoS<sub>2</sub>@C, and the enhancement is not pronounced. These results further confirm that the higher  $b$ -values observed for CoMoS<sub>2</sub>@C relative to MoS<sub>2</sub>@C do not originate from N doping. Importantly,  $b$ -values alone cannot fully

capture the contribution of spin-polarized electrons, as they are relatively insensitive to localized interfacial effects or electronic structure modulation. Complementary analyses, such as spin charge density calculations (Fig. S18 and Tables S7 and S8), EPR (Fig. 4d), and temperature-dependent magnetic susceptibility measurements (Fig. 4e), provide compelling evidence that  $\text{Co}^0$ -induced spin polarization facilitates interfacial  $\text{Na}^+$  storage.

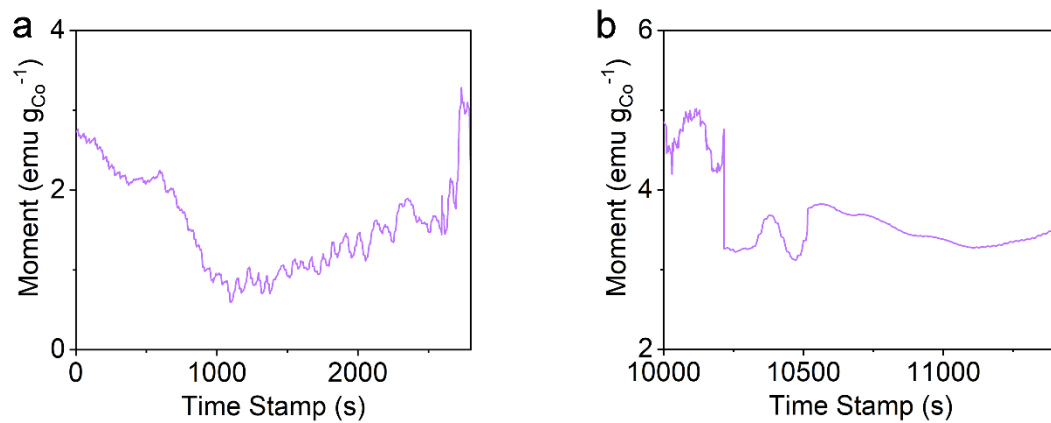

**Fig. S27** Enlarged view of the magnetic response data corresponding to the (a) black and (b) blue dashed circles in Fig. 3h.

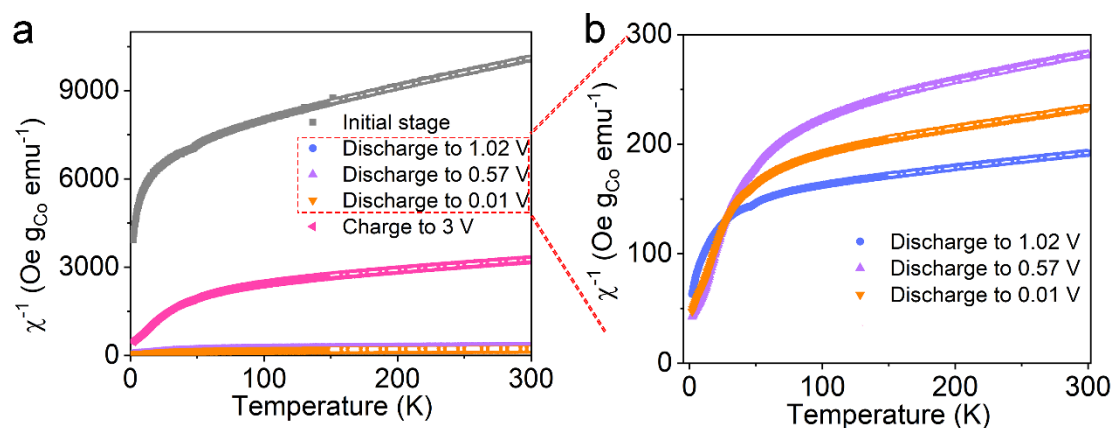

**Fig. S28** (a) Temperature dependence inverse magnetic susceptibilities of CoMoS<sub>2</sub>@C electrode at different electrochemical potentials. (b) The enlarged view of temperature dependence inverse magnetic susceptibilities at different potentials in the red box in Fig. S28(a).

**Table S9** The obtained Curie constant ( $C$ ), effective magnetic moment ( $\mu_{\text{eff}}$ ), and the number of unpaired d electrons ( $n$ ).

| Voltage             | $C$   | $\mu_{\text{eff}} (\mu_B)$ | $n$ |
|---------------------|-------|----------------------------|-----|
| Initial stage       | 0.101 | 0.90                       | 0.4 |
| Discharge to 1.02 V | 7.300 | 7.65                       | 6.7 |
| Discharge to 0.57 V | 3.946 | 5.62                       | 4.7 |
| Discharge to 0.01 V | 5.363 | 6.56                       | 5.6 |
| Charge to 3 V       | 0.275 | 1.48                       | 0.8 |

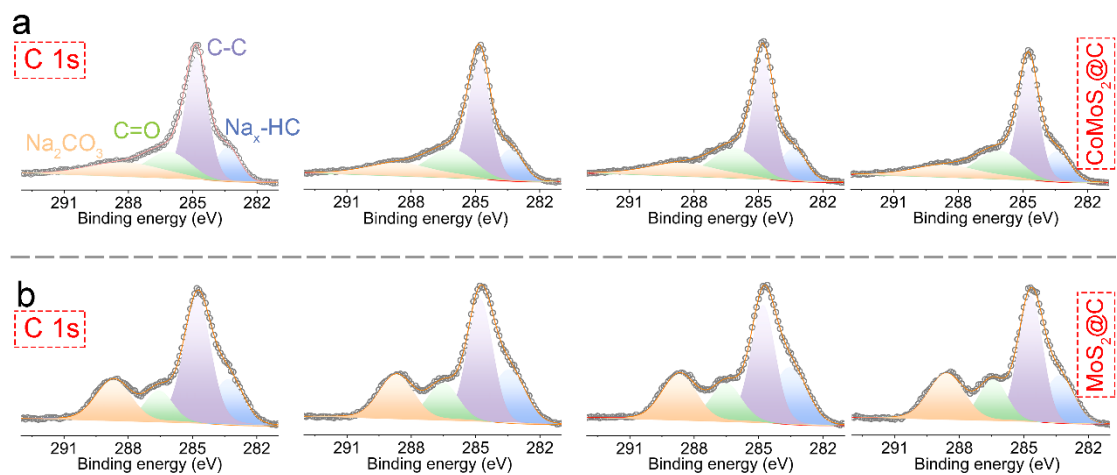

**Fig. S29** C 1s spectra and corresponding depth profiling results of SEI formed in (a) CoMoS<sub>2</sub>@C and (b) MoS<sub>2</sub>@C electrode.



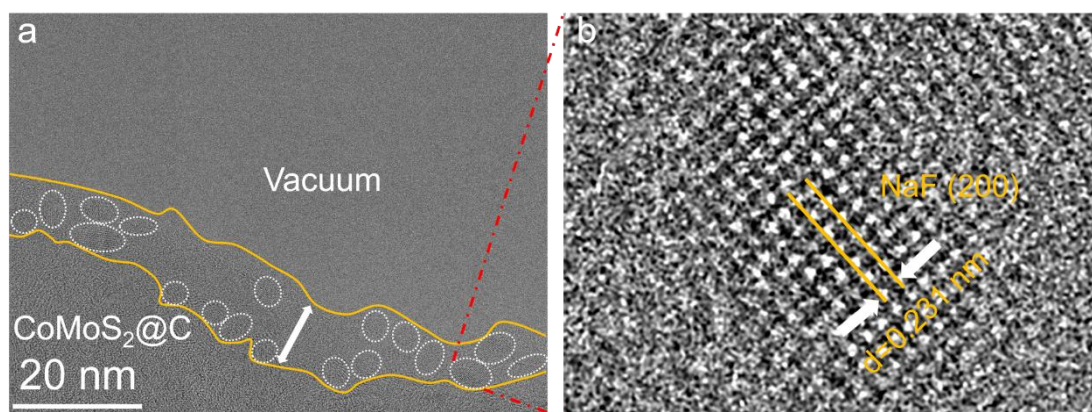

**Fig. S30** (a) Cryo-TEM images of SEI layers of the CoMoS<sub>2</sub>@C electrode and (b) the corresponding magnified view of the selected region in (a).

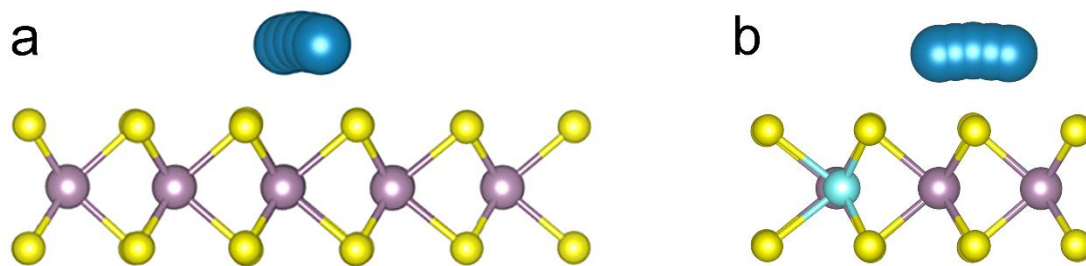

**Fig. S31** Configurations of Na diffused in (a) monolayer MoS<sub>2</sub> and (b) Co-doped monolayer MoS<sub>2</sub>.

## References

- [1] Tang, Jialiang, Daniel Kyungbin Kye, and Vilas G. Pol. J. Power Sources 2018, 396, 476-482.
- [2] Kresse, G.; Furthmüller, J. Comp Mater Sci 1996, 6, (1), 15-50.
- [3] Blöchl, P. E. Phys. Rev. B 1994, 50, (24), 17953-17979.
- [4] Perdew, J. P.; Chevary, J. A.; Vosko, S. H.; Jackson, K. A.; Pederson, M. R.; Singh, D. J.; Fiolhais, C. Phys. Rev. B 1992, 46, (11), 6671-6687.
- [5] Grimme, S.; Antony, J.; Ehrlich, S.; Krieg, H. J. Chem. Phys. 2010, 132, 154104.
